1 **Viral cultures, Polymerase Chain Reaction Cycle Threshold Values and**  
2 **Viral Load Estimation for SARS-CoV-2 Infectious Potential Assessment**  
3 **in Hematopoietic Stem Cell and Solid Organ Transplant Patients: A**  
4 **Systematic Review.**

5 Tom Jefferson<sup>1</sup>, Elizabeth A. Spencer<sup>2</sup>, John M. Conly<sup>7</sup>, Elena C. Rosca<sup>3</sup>, Susanna Maltoni<sup>4</sup>, Jon  
6 Brassey<sup>5</sup>, Igho J. Onakpoya<sup>1</sup>, David H. Evans<sup>6</sup>, Carl J. Heneghan<sup>2</sup>, Annette Plüddemann<sup>2\*</sup>.

7 <sup>1</sup>Department for Continuing Education, University of Oxford, UK

8 <sup>2</sup>Centre for Evidence-Based Medicine, Nuffield Department of Primary Care Health Sciences,  
9 University of Oxford, UK

10 <sup>3</sup>Victor Babes University of Medicine and Pharmacy, Timisoara, Romania

11 <sup>4</sup>Division of Research and Innovation, IRCCS Azienda Ospedaliero-Universitaria di Bologna,  
12 Bologna, Italy

13 <sup>5</sup>Trip Database Ltd, Newport, UK

14 <sup>6</sup>Li Ka Shing Institute of Virology and Dept. of Medical Microbiology & Immunology, University  
15 of Alberta, Canada

16 <sup>7</sup>Departments of Medicine, Microbiology, Immunology & Infectious Diseases, and Pathology &  
17 Laboratory Medicine, Synder Institute for Chronic Diseases and O'Brien Institute for Public

18 Health, Cumming School of Medicine, University of Calgary and Alberta Health Services,

19 Calgary, Canada.

20 \*Corresponding author

21

22

23 **Abstract**

24 Background: Organ transplant recipients are at increased vulnerability to SARS-CoV-2 due to  
25 immunosuppression and may pose a continued transmission risk especially within hospital  
26 settings. Detailed case reports including symptoms, viral load and infectiousness, defined by the  
27 presence of replication-competent viruses in culture, provide an opportunity to examine the  
28 relationship between clinical course, burden and contagiousness, and provide guidance on  
29 release from isolation.

30 Objectives: We performed a systematic review to investigate the relationship in transplant  
31 recipients between serial SARS-CoV-2 RT-PCR cycle threshold (Ct) value or cycle of  
32 quantification value (Cq), or other measures of viral burden and the likelihood and duration of  
33 the presence of infectious virus based on viral culture including the influence of age, sex,  
34 underlying pathologies, degree of immunosuppression, and/or vaccination on this relationship.

35 Methods: We searched LitCovid, medRxiv, Google Scholar and WHO Covid-19 databases, from 1  
36 November 2019 until 31 December 2021. We included studies reporting relevant data for  
37 transplantees with SARS-CoV-2 infection: results from serial RT-PCR testing and viral culture  
38 data from the same respiratory samples. We assessed methodological quality using five criteria,  
39 and synthesised the data narratively and graphically.

40 Results: We included 10 case reports and case series reporting on 38 transplantees. We  
41 observed a relationship between proxies of viral burden and likelihood of shedding replication-  
42 competent SARS-CoV-2. Two individuals shed replication-competent viruses over 100 days after  
43 infection onset. Lack of standardisation of testing and reporting platforms precludes

44 establishing a definitive viral burden cut-off. However, most transplantees stopped shedding  
45 competent viruses when the RT-PCR cycle threshold was above 30 despite differences across  
46 platforms.

#### 47 Conclusions

48 Viral burden is a reasonable proxy for infectivity when considered within the context of the  
49 clinical status of each patient. Standardised study design and reporting are essential to  
50 standardise guidance based on an increasing evidence base.

51

52

53

54

55

#### 56 **Keywords**

57 COVID-19; SARS-CoV-2; transmission; organ transplants; viral culture; polymerase chain  
58 reaction; viral load; cycle threshold calibration; infectivity

59

## 60 Introduction

61 Hematopoietic stem cell transplant (HSCT) and solid organ transplant (SOT) recipients have  
62 significant immunosuppression, affecting both cellular and humoral immunity, and less  
63 favourable outcomes with Severe Acute Respiratory Virus Syndrome 2 (SARS-CoV-2) infection,  
64 due to the immunosuppression and/or to pre-existing comorbidities<sup>1</sup>. Immunosuppression  
65 associated with transplantation places patients at risk for prolonged carriage and shedding of  
66 several respiratory viruses<sup>2</sup>. However, identification of respiratory viral shedding, recently by  
67 reverse transcriptase polymerase chain reaction (RT-PCR), depending on the testing platform  
68 does not correlate with the presence of replication-competent virus<sup>3</sup>. Accordingly, we sought to  
69 perform a systematic review of RT-PCR testing and viral culture of SARS-CoV-2, focussing on  
70 people receiving solid organ or hematopoietic stem cell transplants, following our published  
71 protocol<sup>4</sup>.

72 Our research questions were:

- 73 1. What is the correlation between serial SARS-CoV-2 RT-PCR cycle threshold (Ct) value or  
74 cycle of quantification value (Cq), or other measures of viral burden and the likelihood  
75 of producing replication-competent virus?
- 76 2. What is the likelihood and duration of the presence of infectious virus based on viral  
77 culture, among transplant recipients with SARS-CoV-2 infection?
- 78 3. What is the influence of age, sex, underlying pathologies and degree of  
79 immunosuppression on infectiousness of SARS-CoV-2?

80 4. What is the relationship of vaccination status on infectiousness with SARS-CoV-2?

81 We included studies reporting serial Cts from sequential RT-PCR testing or other measures of  
82 viral burden such as RNA gene copies of respiratory samples (from nasopharyngeal or throat  
83 specimens) along with viral culture data on the same samples, from patients about to receive a  
84 transplant or who were post-transplant, with SARS-CoV-2 infection.

## 85 **Methods**

### 86 **Search Strategy**

87 We searched the following electronic databases: LitCovid, medRxiv, Google Scholar and the  
88 WHO Covid-19 database from November 2019 until December 31, 2021. No language  
89 restrictions were applied.

90 The literature search terms were: (coronavirus OR covid-19 OR SARS-CoV-2) AND  
91 (immunosuppressed OR immunocompromised OR transplant OR immunosuppression OR  
92 "immune deficient" OR HIV) AND (CPE OR "cytopathic effect" OR "Viral culture" OR "virus  
93 culture" OR vero OR "virus replication" OR "viral replication" OR "cell culture" or "viral load" OR  
94 "viral threshold" OR "log copies" OR "cycle threshold").

### 95 **Screening**

96 Four reviewers independently screened titles and abstracts to identify studies for consideration  
97 of full text. Full text screening was performed in duplicate and disagreements arbitrated by a  
98 fifth reviewer.

99 **Inclusion criteria**

100 We included studies reporting serial Cts from sequential RT-PCR testing, or RNA gene copies of  
101 respiratory samples (nasopharyngeal, throat, sputum, bronchoalveolar lavage, endotracheal  
102 tube secretions) AND viral culture data from the same samples from patients about to receive a  
103 transplant or post-transplant with SARS-CoV-2 infection. We included primary studies provided  
104 they reported sufficient information to extract quantitative data on the PCR testing and the  
105 viral culture for each included individual. Studies that included transplant and non-transplant  
106 patients were included if we could ascertain the results separately. Studies reported only in  
107 poster or abstract form were excluded. Reviews were excluded but the reference lists screened  
108 for potential relevant primary studies.

109 **Exclusion criteria**

110 We excluded studies using post-mortem samples only and non-respiratory samples only. We  
111 did not include studies of non-transplant patients or those not attempting viral cultures.

112 **Data extraction**

113 One reviewer extracted data, which was independently checked by a second reviewer.  
114 Disagreements were arbitrated by a third reviewer. Data were extracted on study type and  
115 study characteristics, including population, setting, sampling and laboratory methods, clinical  
116 information, prescribed treatments, vaccination status, laboratory findings, and clinical  
117 outcomes. For three studies we sought clarification from the corresponding authors.

118 **Quality assessment**

119 We assessed the quality of included studies according to five criteria:

- 120 1. Were the criteria for diagnosing a case clearly reported and appropriate?
- 121 2. Was the reporting of patient/population characteristics including clinical symptoms,  
122 treatments with degree of immunosuppression and outcomes adequate?
- 123 3. Was the study period, including follow-up, sufficient to adequately assess any potential  
124 relationship between viral burden measures and likelihood of producing replication-  
125 competent virus and the rise in neutralising antibodies? We defined sufficient as more  
126 than one observation.
- 127 4. Were the methods used to obtain RT-PCR results replicable, generalisable and  
128 appropriate? We considered that each study should establish the relationship between  
129 their Ct values and the target gene copy number, using internal standards.
- 130 5. Were the methods used to obtain viral culture results replicable and appropriate? We  
131 considered the methods used should, at a minimum, include a description of specimen  
132 sampling and management, preparation, media and cell line used, exclusion of  
133 contamination or co-infection (use of good controls and appropriate antibacterials and  
134 antimycotics and possible use of gene sequencing if available), and results of inspection  
135 of culture.

### 136 **Data reporting and pooling**

137 We reported study flow according to PRISMA reporting standards<sup>5</sup>. We reported study  
138 characteristics including age, sex, clinical symptoms, treatments and events in the participants



139 in tabular form. We presented data on disease burden measures and on viral culture in tabular  
140 form. For studies reporting more than one patient participant, data were extracted related to  
141 each participant if available. We plotted median, interquartile ranges (IQRs) and outliers for  
142 viral culture results in relation to the duration of symptoms, and individual study plots to day  
143 120 of viral culture results and cycle thresholds.

144 We were unable to meta-analyse the data on PCR cycle counts/RNA log copies and viral culture,  
145 due to a lack of detailed information on laboratory practices, assays and because of the  
146 absence of internal controls in some studies, and heterogeneous sampling. We therefore  
147 reviewed the studies narratively, and where possible presented the results graphically within  
148 the limitations noted.

149 We analysed the relationship between cycle threshold, days of onset of symptoms and  
150 likelihood of shedding replication-competent virus by presenting the data on a scatter plot

## 151 **Results**

152 The literature search identified 12,988 titles for screening. Of these 63 underwent full-text  
153 review. A total of 53 studies were excluded after full-text analysis: reasons are reported in the  
154 list of excluded studies (see Supplementary File: List of excluded studies)

155 The 10 included studies (Figure 1 reported data for 30 transplant patients (7 females and 23  
156 males): renal (21), cardiac (5), bone marrow transplant (9), liver (2), bilateral lung (1). For one  
157 study the number of males and females was not available for the relevant patient group .<sup>6</sup> The  
158 38 patients were in seven countries: Saudi Arabia<sup>7</sup>, France<sup>8 9</sup>, Germany<sup>10 11 12</sup>, Austria<sup>13</sup>,

159 Denmark<sup>14</sup>, Canada<sup>15</sup> and the USA<sup>6</sup>, and were aged between 26 and 77 years old.

160 A total of 36 were infected with SARS-CoV-2 post-transplant: 21 patients in 3 studies had had  
161 kidney transplant<sup>7 8 12</sup>, 5 patients in 4 studies had had a cardiac transplant<sup>7 10 15 9</sup>, 1 previous  
162 bone marrow transplant for multiple myeloma<sup>14</sup>, 1 liver transplant<sup>14</sup> and eight hematopoietic  
163 cell transplants<sup>6</sup>. Two patients were infected with SARS-CoV-2 and subsequently underwent  
164 transplant: 1 liver transplant<sup>11</sup>, 1 patient had bilateral lung transplantation after a SARS-CoV-2  
165 infection that severely affected the lungs<sup>13</sup>.

166 Typically, patients received<sup>6</sup> a mixture of antivirals, antibiotics, convalescent plasma and  
167 immune suppressants, as reported in Table 1. The clinical course of COVID-19 varied widely  
168 amongst the included patients, from mild COVID-19 related symptoms to severe pneumonia  
169 and lung failure; no deaths were specifically reported for this group, although deaths were  
170 reported for 4 aggregate patients in one study within 30 days of diagnosis<sup>6</sup>. Prescribed  
171 treatments reflected the variation in severity.

## 172 ***Quality Assessment***

173 Table 2 reports study quality based on five criteria. Three studies<sup>15 9 12</sup> met all five criteria.  
174 Follow-up was judged adequate in all studies; in nine studies the reporting of patient  
175 characteristics was sufficiently comprehensive<sup>6 8 10 13 11 14 15 9 12</sup> and clinical information was  
176 missing for one study<sup>7</sup>. Case definition was missing or unclear in four studies<sup>6, 7 10 14</sup>, and  
177 methods for RT-PCR testing were unclear for three studies<sup>6 10 13</sup>. The methods used for viral  
178 culture were unclear in four studies<sup>7 10 13 11</sup> and one study reported using a cell line that has  
179 not typically been used to demonstrate SARS-CoV-2 growth - Buffalo green monkey kidney

180 (BGMK) cell line<sup>8</sup>.

### 181 ***Results of the studies***

182 The results are reported in Table 1 and Table 3. The clinical course of infection was highly  
183 variable (Tables and 1 and 3, and Figures 2 and 3). The time from transplant to infection varied  
184 from days to years (see for example Aydillo et al<sup>6</sup> and Rajakumar et al<sup>15</sup>). Sampling schedules  
185 varied between studies, with no regular timetable of testing taking place, so results for PCR and  
186 viral culture are available for different time points in a patient's clinical course and with  
187 different gaps in time between samples being taken.

188 In response to our first study question on the correlation between proxy indicators of viral  
189 burden and infectiousness, the data from Figures 2 and 3 and Table 3 indicate a correlation  
190 between viral burden (measured as log copies or Cq/Ct) and probable infectiousness. The data  
191 suggests that earlier symptom onset is related to the likelihood of shedding replication-  
192 competent virus (Figure 2). The median time for a positive culture from onset of symptoms was  
193 16 days (IQR 8 to 27; range 1-105, mean 19.7 days n = 59 cultures performed). The median for a  
194 negative culture was 40 days, mean 40.2 days (IQR 22 to 60; range 1-119, n = 107 cultures  
195 performed).

196 Five patients reported by Alshukairi et al were all culture-negative; this was in samples taken on  
197 days 9,12, 17,18 and day 26 since symptom onset, respectively <sup>7</sup>.

198 Seven stem cell transplant recipients from the Aydillo et al letter who had repeated culture  
199 assessments fluctuated in and out of shedding replication-competent virus. One who had a

200 single culture attempt was positive with an estimated Ct of 17.5<sup>6</sup>. Patient MSK-6 shed  
201 replication competent virus until day 62 from symptom onset with an estimated Ct of 19. MSK-  
202 6 showed the longest duration infectious transplant recipient from the Aydillo et al letter<sup>6</sup>.  
203 Eight kidney transplant patients described by Benotmane and colleagues had positive viral  
204 cultures<sup>8</sup>.

205 For six patients we could identify the duration of probable infectiousness, which ranged from 8  
206 days (patient 5: day 1 to 8) to 32 days (patient 7: day 7 to 38). Four patients were infectious  
207 with reported Cts > 30 based on the individual platforms that were used to perform the Cts.

208 Rajakumar et al<sup>15</sup> described two cardiac transplant patients: viral culture found replication-  
209 competent virus in samples from one patient on day 16 and in samples from the other patient  
210 on day 4 and repeatedly up to day 27, after which all viral cultures were negative<sup>15</sup>. For each  
211 patient, viral culture was negative (i.e. no replication-competent virus observed) in samples  
212 with PCR cycle counts of over 25. Within the samples giving positive viral cultures, the PCR  
213 results showed that the cycle threshold for the N gene was lower than for the E gene by an  
214 average of 5.4 Ct values.

215 In the study by Niyonkuru et al, the duration of infectiousness in the two patients, as indicated  
216 by replication-competent virus, was 8 and 9 days (Figure 3)<sup>14</sup>. A cardiac transplant patient  
217 described by Tarhini<sup>9</sup> and colleagues tested culture-positive with a Ct of 23 on day 103; all other  
218 viral cultures were negative from samples with PCR Cts of 18 to over 40<sup>9</sup>.

219 Weigang et al<sup>12</sup> described a kidney transplant patient who experienced three hospital

220 admissions. During the first one (day zero to day 72), 19 RT-qPCR tests were performed, and  
221 alongside that viral culture was performed, showing 8/19 positive cultures (Ct values ranging  
222 from 15 to 25) and 11/19 negative (Ct values from 25 to 30). The patient was culture positive  
223 again on day 105 (Ct of 23). After re-admission at day 140 the patient was still RT-qPCR positive,  
224 but with viral culture negative; he was treated for 10 days (days 141-149) with remdesivir.  
225 Subsequently, negative RT-qPCR tests until day 189 and negative cultures suggested that the  
226 infection had resolved<sup>12</sup>.

227 A heart transplant patient described by Decker<sup>10</sup> and co-workers had a positive viral culture on  
228 day 18 and day 21 with 6.2 and 6.5 log<sub>10</sub> copies/ml.<sup>10</sup>

229 Although the dataset was limited, we observed an inverse relationship (Ct/Cq) or direct  
230 relationship (log copies): the viral burden indicated by these methods correlated with  
231 infectiousness, as shown by the ability to produce replication-competent virus in culture. The  
232 presence of replication-competent virus reflects one of the highest grades of evidence  
233 supporting the capability for forward transmission of SARS-CoV-2<sup>16, 17</sup>.

234 The robustness of the correlation is difficult to assess because laboratory methods differ; it was  
235 not possible to pool the data to produce a summary cut-off value for infectiousness, due to  
236 these variations and due to varying time windows for sampling from patients (see Figure 2 and  
237 Table 3).

238 In response to our second research question (on the likelihood and duration of infectiousness  
239 among transplant recipients with SARS-CoV-2 infection) the data indicate that regardless of  
240 differences in laboratory practices, observed prolonged shedding of replication-competent

241 virus is associated with alternating increases and decreases of viral burden over time, which in  
242 some cases may be up to around 100 days<sup>9 12</sup>.

243 Figure 4 shows the relationship between cycle threshold, symptom onset (in days) and  
244 likelihood of shedding replication competent virus. In Benotmane, five results were reported  
245 with a CT of 30 or above for a positive culture. [8] However, the cell line used in this study is not  
246 demonstrated to support SARS-CoV-2 growth. In the other studies, despite a minimum of 10 different  
247 PCR platforms being used and different culture techniques, the culture results are insensitive to  
248 cycle thresholds above 30. The viral load estimates are affected by administration of courses of  
249 anti-viral treatment including remdesivir. See Figures 3a (Cts/Cqs) and 3b (log copies).

250 Responding to our third research question (the influence of age, sex, underlying pathologies  
251 and degree of immunosuppression on infectiousness): at present the heterogeneity and limited  
252 amount of the available data preclude answering this question.

253 We are unable to answer our fourth and final research question on the relationship of  
254 vaccination status on infectiousness because no study reported on vaccination status for these  
255 transplant patients.

256

257 **Discussion**

258 This review included 10 reports of studies using viral culture and RT-qPCR testing among 38  
259 transplant patients with immunosuppressive treatment who experienced COVID-19 infection.  
260 The evidence indicates a relationship between indicators of viral burden (Ct, Cq or RNA log  
261 copies) and probable infectiousness as indicated by the presence of replication-competent  
262 virus. Gaps in the data remain due to variable methods and reporting and establishing summary  
263 estimates of the relationship has not been possible. The data show a long-term rise and fall of  
264 viral burden associated with the likelihood of infectiousness that in some transplant patients  
265 appears to be a sequential pattern of going in and out of infectiousness. Replication-competent  
266 virus was most commonly observed in samples with PCR Ct values under 25; one study was an  
267 exception to this by reporting viable virus at Ct>30, but the use of a cell line not typically used  
268 for SARS-CoV-2 isolation makes interpretation unclear<sup>8</sup>. The duration of viral RNA shedding was  
269 variable, with the longest duration reported at 105 days<sup>12</sup>. Our findings suggest a Ct of 30 or  
270 greater, regardless of the platform, may be used as a reasonable proxy to rule out infectious  
271 SARS-CoV-2 as there is a consistent correlation between a rising Ct value and likelihood of  
272 isolating replication-competent virus. Such a value would be useful to guide clinicians managing  
273 these difficult patients, particularly if there were repeated values in this range. Below a Ct of 30,  
274 clinicians may choose to repeat NP or throat swabs to assess the direction of the Ct values to  
275 allow a more dynamic assessment which taken in conjunction with the clinical status may  
276 facilitate decision making for isolation or antiviral treatment considerations.

277

278 Regarding our third review question on the influence of patient variables on the likelihood of  
279 the presence of infectious SARS-CoV-2, the included studies showed substantial heterogeneity;  
280 some had missing data or few cultures available, and meta-analysis or pooling was not possible.

281 Variability in the clinical course of SARS-CoV-2 infection among transplant recipients has been  
282 reported, including observed prolonged viral shedding<sup>18</sup>. Antiviral drugs may impact on these  
283 observations, especially symptoms and viral burden.<sup>19</sup>

284 Two well-designed studies on immunosuppressed patients, which we were unable to include  
285 because disaggregated data solely for transplant patients were not fully available, support our  
286 conclusions<sup>6,20</sup>. While this review is limited to transplant patients, evidence suggests similar  
287 prolonged viral cultures are found in immunosuppressed cancer patients. We plan to perform a  
288 further review in this group analysing the type of cancer and the impact of immunotherapies on  
289 viral culture findings.

290 The transplant patient population is of particular importance: clinicians need guidance as to  
291 when to release the patient from quarantine or isolation, given the heavy burden of  
292 immunosuppression. We have tried to narrow the uncertainty and offer some general guidance  
293 as to when patients are unlikely to be shedding replication-competent virus, but clinical  
294 assessment of each patient must inform that decision because each patient and setting is  
295 different.

296 The strengths of this review are that we followed our published protocol, entailing rigorous  
297 literature searches, double checked data extraction and quality assessment, and a high level of  
298 clinical and epidemiological expertise input to deliberate the findings. We were also able to



299 include data from an additional 8 transplant recipients after extensive correspondence with the  
300 study authors<sup>6</sup>. Limitations include the small number of studies with viral culture and serial viral  
301 load estimates among transplant patients, high variability in study design and reporting and  
302 impossibility to pool results due to the well-known variability in sensitivity across assays<sup>21</sup>.

303 Case series are conventionally considered low in the evidence hierarchy, as they may entail  
304 inherent bias in the selection of study participants and therefore have limited generalisability;  
305 however, here they are essential in providing the detailed reports needed for this unusual  
306 patient group. The case reports included here comprise some of the most detailed longitudinal  
307 reports of this patient group for whom data are needed. The evidence base is limited, however,  
308 by heterogeneous design and reporting within the studies with, for example, different  
309 observation windows for reporting of viral burden and culturability or clinical characteristics of  
310 patients.

311 In addition to providing appropriate care for the individual patient, ongoing transmission of  
312 SARS-CoV-2 is a concern, and immunosuppressed individuals may pose a challenge by  
313 experiencing prolonged carriage of the virus that could lead to forward transmission. Based on  
314 our findings we would offer the following general guidance to clinicians:

315 Physicians who are experienced with these immunosuppressed patient populations should  
316 work with public health to direct their isolation and quarantine requirements. Infectious  
317 patients with immunosuppressive treatment following solid organ or stem cell transplantation  
318 should be isolated until at least two consecutive respiratory specimens collected  $\geq 24$  hours  
319 apart demonstrate a rising RT-PCR Ct (i.e. indicating diminishing viral burden). After discharge,

320 they should be closely followed up for SARS-CoV-2 infection for several weeks to months,  
321 depending on the individual clinical scenario.

322 For obtaining data, standardisation of methods is needed: each laboratory should use  
323 consistently applied platforms with suitable internal standards to calibrate the relationship  
324 between Ct and genome copy in these patient populations.

325 Publication of results of case series or other longitudinal study should be reported in a  
326 standardised format to avoid loss of data. We suggest observation windows should be within a  
327 short range of 3 to 7 days during the acute periods post-transplantation and during periods of  
328 rejection when higher doses of immunosuppressants are employed, depending on clinical  
329 circumstances. Each observation window should include a summary of symptoms and  
330 interventions, the reporting of PCR cycle threshold and, for samples with Ct below 30, attempts  
331 at viral culture if available. Description of patients should include past medical histories and  
332 details of treatments received. Observed drug interactions should be highlighted. Reasons for  
333 admission, discharge and changes in isolation should be clearly reported. To investigate the  
334 duration of viral shedding, studies should report the time between the first positive and the  
335 first negative viral cultures.

336 With additional data gathering and standardisation of methods, it will be possible for transplant  
337 physicians to develop evidence-based approaches to dealing with these patients for the benefit  
338 of the patients and their families and the community at large.

339

340 **Acknowledgements**

341 We gratefully acknowledge the contributions of Drs Mini Kamboj and Jeroen van Kampen  
342 who provided additional data from their studies and helped us to progress this work.

343

344 **Funding**

345 This work is supported by the National Institute for Health Research School for Primary  
346 Care Research [Project 569] and by the University of Calgary.

347

348 **Author contributions**

349 TJ, CH and JC designed the study. JB performed the literature searches. JB, TJ, SM, ER and  
350 ES, screened the studies for eligibility and performed data extraction. Additional expertise  
351 on clinical and laboratory issues was given by DE, JC, SM and ER. CH generated the data  
352 figures. All authors contributed to interpreting and writing up the results and conclusions.

353

354 **Ethics declarations**

355 Ethics approval and consent to participate:

356 This is a systematic review and meta-analysis. Therefore, ethical approval is not applicable.

357 Consent for publication:

358 Not applicable.

359

360 **Availability of data and materials**

361 All data generated or analysed during this study are included in this published article [and its  
362 supplementary information files].

363

364 **Competing Interests**

365 TJ's competing interests are accessible at: [https://restoringtrials.org/competing-interests-tom-  
366 jefferson](https://restoringtrials.org/competing-interests-tom-jefferson)

367 CJH holds grant funding from the NIHR, the NIHR School of Primary Care Research, the NIHR  
368 BRC Oxford and the World Health Organization for a series of Living rapid review on the modes  
369 of transmission of SARs-CoV-2 reference WHO registration No2020/1077093. He has received  
370 financial remuneration from an asbestos case and given legal advice on mesh and hormone  
371 pregnancy tests cases. He has received expenses and fees for his media work including  
372 occasional payments from BBC Radio 4 Inside Health and The Spectator. He receives expenses  
373 for teaching EBM and is also paid for his GP work in NHS out of hours (contract Oxford Health  
374 NHS Foundation Trust). He has also received income from the publication of a series of toolkit  
375 books and for appraising treatment recommendations in non-NHS settings. He is Director of  
376 CEBM and is an NIHR Senior Investigator.

377 DE holds grant funding from the Canadian Institutes for Health Research and Li Ka Shing  
378 Institute of Virology relating to the development of Covid-19 vaccines as well as the Canadian  
379 Natural Science and Engineering Research Council concerning Covid-19 aerosol transmission.  
380 He is a recipient of World Health Organization and Province of Alberta funding which supports  
381 the provision of BSL3-based SARS-CoV-2 culture services to regional investigators. He also holds  
382 public and private sector contract funding relating to the development of poxvirus-based Covid-  
383 19 vaccines, SARS-CoV-2-inactivation technologies, and serum neutralization testing.

384 JMC holds grants from the Canadian Institutes for Health Research on acute and primary care  
385 preparedness for COVID-19 in Alberta, Canada and was the primary local Investigator for a  
386 *Staphylococcus aureus* vaccine study funded by Pfizer for which all funding was provided only to  
387 the University of Calgary. He is co-investigator on a WHO funded study using integrated human  
388 factors and ethnography approaches to identify and scale innovative IPC guidance  
389 implementation supports in primary care with a focus on low-resource settings and using drone  
390 aerial systems to deliver medical supplies and PPE to remote First Nations communities during  
391 the COVID-19 pandemic. He also received support from the Centers for Disease Control and  
392 Prevention (CDC) to attend an Infection Control Think Tank Meeting. He is a member and Chair  
393 of the WHO Infection Prevention and Control Research and Development Expert Group for  
394 COVID-19 and a member of the WHO Health Emergencies Programme (WHE) Ad-hoc COVID-19  
395 IPC Guidance Development Group, both of which provide multidisciplinary advice to the WHO  
396 and for which no funding is received and from which no funding recommendations are made  
397 for any WHO contracts or grants. He is also a member of the Cochrane Acute Respiratory  
398 Infections Working Group.

399 JB is a major shareholder in the Trip Database search engine ([www.tripdatabase.com](http://www.tripdatabase.com)) as well as  
400 being an employee. In relation to this work Trip has worked with a large number of  
401 organisations over the years, none have any links with this work. The main current projects are  
402 with AXA and SARS-CoV-2 (WHO Registration 2020/1077093-0) and is part of the review group  
403 carrying out rapid reviews for Collateral Global. He worked on Living rapid literature review on  
404 the modes of transmission of SARS-CoV-2 and a scoping review of systematic reviews and meta-  
405 analyses of interventions designed to improve vaccination uptake (WHO Registration  
406 2021/1138353-0).

407 ECR was a member of the European Federation of Neurological Societies (EFNS) / European  
408 Academy of Neurology (EAN) Scientist Panel, Subcommittee of Infectious Diseases (2013 to  
409 2017). Since 2021, she is a member of the International Parkinson and Movement Disorder  
410 Society (MDS) Multiple System Atrophy Study Group, the Mild Cognitive Impairment in  
411 Parkinson Disease Study Group, and the Infection Related Movement Disorders Study Group.  
412 She was an External Expert and sometimes Rapporteur for COST proposals (2013, 2016, 2017,  
413 2018, 2019) for Neurology projects. She is a Scientific Officer for the Romanian National Council  
414 for Scientific Research.

415 AP holds grants from the NIHR School for Primary Care Research.

416 IJO and EAS have no interests to disclose.

417 SM is a pharmacist working for the Italian National Health System since 2002 and a member of  
418 one of the three Institutional Review Boards of Emilia-Romagna Region (Comitato Etico Area  
419 Vasta Emilia Centro) since 2018.

420

421

## 422 References

423

- 424 1. Jering, K.S., et al., *Excess mortality in solid organ transplant recipients hospitalized with COVID-*  
425 *19: A large-scale comparison of SOT recipients hospitalized with or without COVID-19.* Clin  
426 Transplant, 2022. **36**(1): p. e14492. 10.1111/ctr.14492.
- 427 2. Andersen, K.M., et al., *Long-term use of immunosuppressive medicines and in-hospital COVID-19*  
428 *outcomes: a retrospective cohort study using data from the National COVID Cohort*  
429 *Collaborative.* (2665-9913 (Electronic)).
- 430 3. Fernández-Ruiz, M. and J.M. Aguado, *Severe acute respiratory syndrome coronavirus 2 infection*  
431 *in the stem cell transplant recipient - clinical spectrum and outcome.* Curr Opin Infect Dis, 2021.  
432 **34**(6): p. 654-662. 10.1097/qco.0000000000000790.
- 433 4. Jefferson, T., et al., *Viral cultures, PCR Cycle threshold values and viral load estimation for*  
434 *COVID-19 infectious potential assessment in transplant patients: systematic review - Protocol*  
435 *Version 30 December 2021.* medRxiv, 2022: p. 2021.12.30.21268509.  
436 10.1101/2021.12.30.21268509.
- 437 5. Page, M.J., et al., *The PRISMA 2020 statement: an updated guideline for reporting systematic*  
438 *reviews.* BMJ, 2021. **372**: p. n71. 10.1136/bmj.n71.
- 439 6. Aydillo, T., et al., *Shedding of Viable SARS-CoV-2 after Immunosuppressive Therapy for Cancer.*  
440 New England Journal of Medicine, 2020. **383**(26): p. 2586-2588. 10.1056/NEJMc2031670.
- 441 7. Alshukairi, A.N., et al., *Test-based de-isolation in COVID-19 immunocompromised patients: Cycle*  
442 *threshold value versus SARS-CoV-2 viral culture.* International Journal of Infectious Diseases,  
443 2021. **108**: p. 112-115. 10.1016/j.ijid.2021.05.027.
- 444 8. Benotmane, I., et al., *Long-term shedding of viable SARS-CoV-2 in kidney transplant recipients*  
445 *with COVID-19.* American Journal of Transplantation, 2021. **21**(8): p. 2871-2875.  
446 <https://doi.org/10.1111/ajt.16636>.
- 447 9. Tarhini, H., et al., *Long-Term Severe Acute Respiratory Syndrome Coronavirus 2 (SARS-CoV-2)*  
448 *Infectiousness Among Three Immunocompromised Patients: From Prolonged Viral Shedding to*  
449 *SARS-CoV-2 Superinfection.* The Journal of Infectious Diseases, 2021. **223**(9): p. 1522-1527.  
450 10.1093/infdis/jiab075.
- 451 10. Decker, A., et al., *Prolonged SARS-CoV-2 shedding and mild course of COVID-19 in a patient after*  
452 *recent heart transplantation.* Am J Transplant, 2020. **20**(11): p. 3239-3245. 10.1111/ajt.16133.
- 453 11. Niess, H., et al., *Liver transplantation in a patient after COVID-19 - Rapid loss of antibodies and*  
454 *prolonged viral RNA shedding.* Am J Transplant, 2021. **21**(4): p. 1629-1632. 10.1111/ajt.16349.
- 455 12. Weigang, S., et al., *Within-host evolution of SARS-CoV-2 in an immunosuppressed COVID-19*  
456 *patient: a source of immune escape variants.* medRxiv, 2021: p. 2021.04.30.21256244.  
457 10.1101/2021.04.30.21256244.
- 458 13. Lang, C., et al., *Lung transplantation for COVID-19-associated acute respiratory distress*  
459 *syndrome in a PCR-positive patient.* The Lancet Respiratory Medicine, 2020. **8**(10): p. 1057-1060.  
460 10.1016/S2213-2600(20)30361-1.
- 461 14. Niyonkuru, M., et al., *Prolonged viral shedding of SARS-CoV-2 in two immunocompromised*  
462 *patients, a case report.* BMC Infectious Diseases, 2021. **21**(1): p. 743. 10.1186/s12879-021-  
463 06429-5.
- 464 15. Rajakumar, I.A.-O., et al., *Extensive environmental contamination and prolonged severe acute*  
465 *respiratory coronavirus-2 (SARS CoV-2) viability in immunosuppressed recent heart transplant*  
466 *recipients with clinical and virologic benefit with remdesivir.* (1559-6834 (Electronic)).



- 467 16. Jefferson, T., et al., *Transmission of Severe Acute Respiratory Syndrome Coronavirus-2 (SARS-*  
468 *CoV-2) from pre and asymptomatic infected individuals. A systematic review.* Clinical  
469 Microbiology and Infection, 2021. <https://doi.org/10.1016/j.cmi.2021.10.015>.
- 470 17. Jefferson, T.H., C.; Spencer, E.; Brassey, J.; Pluddeman, A.; Onakpoya, I.; Evans, D.; Conly, J. A  
471 *Hierarchical Framework for Assessing Transmission Causality of Respiratory Viruses.* PrePrints,  
472 2021. 10.20944/preprints202104.0633.v1.
- 473 18. Marinelli, T., et al., *Prospective Clinical, Virologic, and Immunologic Assessment of COVID-19 in*  
474 *Transplant Recipients.* Transplantation, 2021. **105**(10): p. 2175-2183.  
475 10.1097/tp.0000000000003860.
- 476 19. Thornton, C.S., et al., *Prolonged SARS-CoV-2 infection following rituximab treatment: clinical*  
477 *course and response to therapeutic interventions correlated with quantitative viral cultures and*  
478 *cycle threshold values.* Antimicrob Resist Infect Control, 2022. **11**(1): p. 28. 10.1186/s13756-022-  
479 01067-1.
- 480 20. van Kampen, J.J.A., et al., *Shedding of infectious virus in hospitalized patients with coronavirus*  
481 *disease-2019 (COVID-19): duration and key determinants.* medRxiv, 2020: p.  
482 2020.06.08.20125310. 10.1101/2020.06.08.20125310.
- 483 21. Bruce, E.A., et al., *Predicting infectivity: comparing four PCR-based assays to detect culturable*  
484 *SARS-CoV-2 in clinical samples.* EMBO Mol Med, 2021: p. e15290. 10.15252/emmm.202115290.
- 485

486

487 **List of tables and figures.**

488

489 Table 1. Characteristics of transplant patients in included studies.

490

491 Table 2. Quality of included studies.

492

493 Table 3. PCR cycle counts/log copies and viral culture results of included studies.

494

495 Figure 1. PRISMA flow chart of study screening for inclusion.

496

497 Figure 2. SARs-CoV-2 culture results in transplant patients from days of symptom onset.

498

499 Figure 3. Duration of infectivity as indicated by viral culture and corresponding PCR cycle counts/log  
500 copies among transplant recipients.

501

502 Figure 4. Relationship between cycle threshold and symptom onset (in days)

503

504 **List of supplementary files.**

505

506 Supplementary file. Literature search strategy.

507

508 Supplementary file. List of excluded studies, with reasons.

509

510 **Table 1.** Characteristics of transplant patients in included studies.

| Study ID        | Participants<br>(data extracted<br>for transplant<br>patients) | Transplant,<br>immunosuppressive<br>treatment &<br>comorbidities                   | Clinical course<br>of COVID-19<br>infection    | COVID-19<br>treatments                                      |
|-----------------|----------------------------------------------------------------|------------------------------------------------------------------------------------|------------------------------------------------|-------------------------------------------------------------|
| Alshukairi 2021 | Pt1: 34 yr F<br>Pt2: 71 yr M<br>Pt3: 75 yr M<br>Pt4: 26 yr M   | Pt1: cardiac, in 2014,<br>tacrolimus, MMF,<br>prednisolone<br>Pt2: renal, in 2014, | Pt1: Severe<br>pneumonia;<br>Pt2:<br>pneumonia | Pt1: high-flow<br>nasal cannula<br>Pt2: low-flow<br>cannula |

| Study ID     | Participants<br>(data extracted<br>for transplant<br>patients) | Transplant,<br>immunosuppressive<br>treatment &<br>comorbidities                                                                                                                                                                                                           | Clinical course<br>of COVID-19<br>infection              | COVID-19<br>treatments                                                     |
|--------------|----------------------------------------------------------------|----------------------------------------------------------------------------------------------------------------------------------------------------------------------------------------------------------------------------------------------------------------------------|----------------------------------------------------------|----------------------------------------------------------------------------|
|              | Pt5: 38 yr F                                                   | tacrolimus, MMF,<br>prednisolone, DM,<br>HTN, CAD<br>Pt3: renal, in 2014,<br>tacrolimus, MMF and<br>prednisolone, HTN<br>Pt4: renal, in 2018,<br>tacrolimus, MMF,<br>prednisolone, DM<br>Pt5: renal in 2014,<br>tacrolimus, AZA,<br>prednisolone, APS &<br>hypothyroidism. | Pt3:<br>pneumonia<br>Pt4:<br>pneumonia<br>Pt5: upper RTI | Pt3: low-flow<br>cannula<br>Pt4: oxygen not<br>required<br>Pt5: no cannula |
| Aydillo 2020 | 8 pts (no. of M<br>and F and age<br>N/A for this               | Various antibiotics<br>and<br>immunosuppressants                                                                                                                                                                                                                           | Variable from<br>mild to severe                          | Hydroxychloroq<br>uine,<br>remdesivir,                                     |

| Study ID            | Participants<br>(data extracted<br>for transplant<br>patients)                                                                                                                                                           | Transplant,<br>immunosuppressive<br>treatment &<br>comorbidities                                                                                                                                                                                     | Clinical course<br>of COVID-19<br>infection                                                         | COVID-19<br>treatments                                                                  |
|---------------------|--------------------------------------------------------------------------------------------------------------------------------------------------------------------------------------------------------------------------|------------------------------------------------------------------------------------------------------------------------------------------------------------------------------------------------------------------------------------------------------|-----------------------------------------------------------------------------------------------------|-----------------------------------------------------------------------------------------|
|                     | subset)                                                                                                                                                                                                                  |                                                                                                                                                                                                                                                      |                                                                                                     | azythromicin,<br>convalescent<br>plasma                                                 |
| Benotmane I<br>2021 | 14 M, 2 F,<br>median age<br>63.3 yrs.<br>Pts with at least<br>two positive for<br>SARS-CoV-2 NP<br>swabs (of which<br>one collected at<br>least 7 days<br>after symptom<br>onset) during<br>the follow-up<br>period were | 16 kidney transplant<br>recipients; median<br>time from transplant<br>3.8 yrs.<br>Antithymocyte<br>globulin: 8/16; anti-<br>CD25: 8/16;<br>tacrolimus: 10/16;<br>ciclosporin: 3/16;<br>MMF/MPA: 14/16;<br>mTOR inhibitors:<br>2/16; steroids: 10/16; | All 16<br>hospitalized<br>for<br>symptomatic<br>COVID-19<br>between 4<br>March and 15<br>April 2020 | lopinavir/<br>ritonavir: 1/16;<br>hydroxychloroq<br>uine: 8/16;<br>tocilizumab:<br>2/16 |

| Study ID      | Participants<br>(data extracted<br>for transplant<br>patients) | Transplant,<br>immunosuppressive<br>treatment &<br>comorbidities                                                                                                                                                                            | Clinical course<br>of COVID-19<br>infection                                                                 | COVID-19<br>treatments                                            |
|---------------|----------------------------------------------------------------|---------------------------------------------------------------------------------------------------------------------------------------------------------------------------------------------------------------------------------------------|-------------------------------------------------------------------------------------------------------------|-------------------------------------------------------------------|
|               | eligible for<br>inclusion                                      | belatacept: 2/16                                                                                                                                                                                                                            |                                                                                                             |                                                                   |
| Decker A 2020 | 62 yr M                                                        | Heart transplant Nov 2019; subsequently pneumonia and acute respiratory distress syndrome; intermittent renal replacement therapy. Cyclosporine A (target range 135 ± 30 ng/mL), mycophenolate mofetil 500 mg b.i.d., prednisone 10 mg q.d. | 1 March 2020 onset of symptoms and +ve PCR; mild symptoms, no cardiorespiratory decline, several weeks +ve. | hydroxychloroquine (400mg b.i.d. + 200mg b.i.d.) from day 7 to 14 |

| Study ID    | Participants<br>(data extracted<br>for transplant<br>patients)                                      | Transplant,<br>immunosuppressive<br>treatment &<br>comorbidities                                                                                                                       | Clinical course<br>of COVID-19<br>infection                                                    | COVID-19<br>treatments                                                                   |
|-------------|-----------------------------------------------------------------------------------------------------|----------------------------------------------------------------------------------------------------------------------------------------------------------------------------------------|------------------------------------------------------------------------------------------------|------------------------------------------------------------------------------------------|
|             |                                                                                                     | + cotrimoxazole and<br>due to<br>cytomegalovirus high-<br>risk constellation (D +<br>R-), ganciclovir for 4<br>months post-<br>transplantation, then<br>valganciclovir<br>prophylaxis. |                                                                                                |                                                                                          |
| Lang C 2020 | 44 yr old F with<br>mild untreated<br>psoriatic<br>arthritis and<br>idiopathic CD4<br>lymphocytopen | Bilateral lung<br>transplant day 58<br>after admission for<br>Covid-19.<br>Subsequently,<br>standard triple                                                                            | Day 0 admitted<br>with fever,<br>cough, +ve NP<br>RT-PCR. Day 6<br>to ICU &<br>intubation; day | Immunoglobuli<br>ns, tocilizumab<br>&<br>lopinavir.<br>Day 6 to ICU &<br>intubation; day |

| Study ID   | Participants<br>(data extracted<br>for transplant<br>patients) | Transplant,<br>immunosuppressive<br>treatment &<br>comorbidities                                                                                                               | Clinical course<br>of COVID-19<br>infection                                                                                                                  | COVID-19<br>treatments             |
|------------|----------------------------------------------------------------|--------------------------------------------------------------------------------------------------------------------------------------------------------------------------------|--------------------------------------------------------------------------------------------------------------------------------------------------------------|------------------------------------|
|            | ia                                                             | immunosuppression was initiated, including tacrolimus, mycophenolate mofetil, and steroids; also 6 additional treatment cycles of immunoabsorption and antithymocyte globulin. | 13 ECMO. Day 52 preparation begun for transplant: immunoabsorption therapy; day 58 bilateral lung transplant performed. Transferred to non ICU ward day 121. | 13 ECMO. Bilateral lung transplant |
| Niess 2020 | 56 yr M patient listed for liver transplantation with a Model  | admission for liver transplant: 18/3/2020 positive to COVID-19 screening on                                                                                                    |                                                                                                                                                              |                                    |

| Study ID            | Participants<br>(data extracted<br>for transplant<br>patients)                                                                | Transplant,<br>immunosuppressive<br>treatment &<br>comorbidities                                                                                                                                                        | Clinical course<br>of COVID-19<br>infection                               | COVID-19<br>treatments                                                          |
|---------------------|-------------------------------------------------------------------------------------------------------------------------------|-------------------------------------------------------------------------------------------------------------------------------------------------------------------------------------------------------------------------|---------------------------------------------------------------------------|---------------------------------------------------------------------------------|
|                     | For End-Stage<br>Liver Disease<br>Score of 19<br>points due to<br>cryptogenic<br>cirrhosis and a<br>history of<br>hepatitis B | 25/3/2021<br>after 31-32 days: PCR<br>negative +<br>seroconversion<br>after 36 days of<br>symptom onset and<br>21 days after<br>seronconversion:<br>transplant; tacrolimus<br>(to target of 4 to 7<br>ng/ml) + steroids |                                                                           |                                                                                 |
| Niyonkuru M<br>2021 | Pt1: 66 yr M,<br>recent liver<br>transplant<br><br>Pt2: 70 yr M,                                                              | Pt1: fatigue and<br>tachypnea, hospital<br>admission, tested<br>positive for SARS-CoV-<br>2                                                                                                                             | Pt1 day 0 +ve<br>test. Symptom<br>onset day 5,<br>diminished<br>taste and | Pt1: In ICU, non<br>invasive<br>ventilation, IV<br>dexamethason<br>e 6 mg daily |



| Study ID | Participants<br>(data extracted<br>for transplant<br>patients) | Transplant,<br>immunosuppressive<br>treatment &<br>comorbidities                                                                                                                                                                                                 | Clinical course<br>of COVID-19<br>infection                                                                                                                                                             | COVID-19<br>treatments                                                                                             |
|----------|----------------------------------------------------------------|------------------------------------------------------------------------------------------------------------------------------------------------------------------------------------------------------------------------------------------------------------------|---------------------------------------------------------------------------------------------------------------------------------------------------------------------------------------------------------|--------------------------------------------------------------------------------------------------------------------|
|          | previous bone marrow transplant for multiple myeloma           | Pt2: pacemaker.<br>Lenalidomide 25 mg daily. elevated CRP concentration (130 mg/L).<br>Nocardia Farcinica was detected in blood cultures and pus from abscesses on the left leg. Trans-esophageal echocardiography showed vegetation on the pacemaker electrode. | smell; day 12 additional symptoms; day 14 hospital admission. On day 12 from symptom onset transferred to the ICU for non-invasive ventilation.<br>Pt2 admitted on October 21 due to fever and elevated | and remdesivir: 200 mg the first day and 100 mg the following 4 days.<br>Pt2: no COVID-19 treatment (asymptomatic) |

| Study ID | Participants<br>(data extracted<br>for transplant<br>patients) | Transplant,<br>immunosuppressive<br>treatment &<br>comorbidities | Clinical course<br>of COVID-19<br>infection                                                                                                                                                 | COVID-19<br>treatments |
|----------|----------------------------------------------------------------|------------------------------------------------------------------|---------------------------------------------------------------------------------------------------------------------------------------------------------------------------------------------|------------------------|
|          |                                                                |                                                                  | <p>CRP concentration (130 mg/L) because of systemic infection due to pacemaker contamination; periodic screening during admission; positive by week 4, always asymptomatic of COVID-19.</p> |                        |

| Study ID       | Participants<br>(data extracted<br>for transplant<br>patients)                                                                                                                                                          | Transplant,<br>immunosuppressive<br>treatment &<br>comorbidities                                                                                                                                                                                                    | Clinical course<br>of COVID-19<br>infection                                                                                                                                                          | COVID-19<br>treatments                                                                                                                                                                                       |
|----------------|-------------------------------------------------------------------------------------------------------------------------------------------------------------------------------------------------------------------------|---------------------------------------------------------------------------------------------------------------------------------------------------------------------------------------------------------------------------------------------------------------------|------------------------------------------------------------------------------------------------------------------------------------------------------------------------------------------------------|--------------------------------------------------------------------------------------------------------------------------------------------------------------------------------------------------------------|
| Rajakumar 2021 | Two cardiac transplant recipients (<3 months post-transplant):<br><br>Pt1: 56 yr F; history of dilated cardiomyopathy with end-stage heart failure, type-2 diabetes mellitus, hypothyroidism, osteoporosis, and anemia. | Pt1: orthotopic heart transplant with antithymocyte globulin induction & standard triple immunosuppressive therapy & was discharged 30 days later.<br><br>Pt2: orthotopic heart transplant with antithymocyte globulin induction therapy, discharged 4 weeks later. | NP swabs (& saliva & clinical & environmental samples) were collected at regular intervals beginning shortly after admission.<br><br>Pt 1: 5 days post-discharge, rehospitalized following community | Pt1: after day 15, corticosteroids & antimicrobials initiated for presumptive COVID-19 pneumonitis & superimposed bacterial pneumonia;<br><br>day 21 O2 requirements increased significantly.<br><br>Despite |

| Study ID | Participants<br>(data extracted<br>for transplant<br>patients)                                                                                                          | Transplant,<br>immunosuppressive<br>treatment &<br>comorbidities                                                                     | Clinical course<br>of COVID-19<br>infection                                                                                                                                                                                                                            | COVID-19<br>treatments                                                                                                                                                                                                                                                                             |
|----------|-------------------------------------------------------------------------------------------------------------------------------------------------------------------------|--------------------------------------------------------------------------------------------------------------------------------------|------------------------------------------------------------------------------------------------------------------------------------------------------------------------------------------------------------------------------------------------------------------------|----------------------------------------------------------------------------------------------------------------------------------------------------------------------------------------------------------------------------------------------------------------------------------------------------|
|          | <p>Pt2: 33 yr F<br/>with a history<br/>of end-stage<br/>heart failure<br/>2ndary to<br/>congenital<br/>heart disease,<br/>liver cirrhosis &amp;<br/>kidney disease.</p> | <p>Pt1 and Pt2:<br/>prednisone,<br/>tacrolimus, and<br/>mycophenolate<br/>mofetil, and standard<br/>prophylactic<br/>medications</p> | <p>exposure to<br/>COVID-19.<br/>Nasal<br/>stiffness &amp;<br/>discharge,<br/>sneezing,<br/>fatigue &amp;<br/>cough<br/>developed on<br/>admission day<br/>4; NP swab +ve<br/>for SARS-CoV-<br/>2. All<br/>symptoms<br/>except fatigue<br/>resolved by<br/>day 12.</p> | <p>discontinuation<br/>of MMF &amp;<br/>reduction of<br/>tacrolimus,<br/>cultivable<br/>viral loads<br/>increased in<br/>the NP &amp; saliva;<br/>chest<br/>radiograph &amp;<br/>clinical<br/>condition<br/>deteriorated;<br/>mechanical<br/>ventilation<br/>considered. 10-<br/>day course of</p> |

| Study ID | Participants<br>(data extracted<br>for transplant<br>patients) | Transplant,<br>immunosuppressive<br>treatment &<br>comorbidities | Clinical course<br>of COVID-19<br>infection                                                                                                                                                                       | COVID-19<br>treatments                                                                                                                                                                                |
|----------|----------------------------------------------------------------|------------------------------------------------------------------|-------------------------------------------------------------------------------------------------------------------------------------------------------------------------------------------------------------------|-------------------------------------------------------------------------------------------------------------------------------------------------------------------------------------------------------|
|          |                                                                |                                                                  | <p>Dyspnea, cough &amp; hypoxia then developed on day 15; chest radiograph revealed new bibasilar interstitial infiltrates. Discharged day 44.</p> <p>Pt2: tested +ve for SARS-CoV-2 shortly after discharge,</p> | <p>remdesivir initiated day 27. Clinical condition &amp; chest radiograph improved; O2 discontinued day 32; discharged day 44.</p> <p>Pt2: intubation. MMF dose was reduced; dexamethason e &amp;</p> |

| Study ID | Participants<br>(data extracted<br>for transplant<br>patients) | Transplant,<br>immunosuppressive<br>treatment &<br>comorbidities | Clinical course<br>of COVID-19<br>infection                                                                                                                                                                           | COVID-19<br>treatments                                                                                                                                                                                    |
|----------|----------------------------------------------------------------|------------------------------------------------------------------|-----------------------------------------------------------------------------------------------------------------------------------------------------------------------------------------------------------------------|-----------------------------------------------------------------------------------------------------------------------------------------------------------------------------------------------------------|
|          |                                                                |                                                                  | <p>readmitted 1 week later with progressive dyspnea &amp; hypoxemia requiring intubation.</p> <p>Significant viable virus burdens were noted in the NP swab (&amp; saliva, &amp; a used face cloth) 16 days after</p> | <p>antimicrobials initiated. MMF was subsequently held &amp; later restarted when an echocardiogram demonstrated a reduction in left ventricular systolic function, suggesting acute graft rejection.</p> |

| Study ID | Participants<br>(data extracted<br>for transplant<br>patients) | Transplant,<br>immunosuppressive<br>treatment &<br>comorbidities | Clinical course<br>of COVID-19<br>infection                                                                              | COVID-19<br>treatments                                                                                                                                              |
|----------|----------------------------------------------------------------|------------------------------------------------------------------|--------------------------------------------------------------------------------------------------------------------------|---------------------------------------------------------------------------------------------------------------------------------------------------------------------|
|          |                                                                |                                                                  | initial SARS-CoV-2 positivity. 5-day course remdesivir initiated followed by clinical recovery & discharge 7 days later. | Pt1: 10-day course of remdesivir from day 27 to day 37 from hospital admission; improvement and subsequent discharge on day 44<br><br>Pt2: 5-day course remdesivir, |

| Study ID     | Participants<br>(data extracted<br>for transplant<br>patients) | Transplant,<br>immunosuppressive<br>treatment &<br>comorbidities                                                              | Clinical course<br>of COVID-19<br>infection                                                                                                                                                            | COVID-19<br>treatments                                                                                                                                                                                        |
|--------------|----------------------------------------------------------------|-------------------------------------------------------------------------------------------------------------------------------|--------------------------------------------------------------------------------------------------------------------------------------------------------------------------------------------------------|---------------------------------------------------------------------------------------------------------------------------------------------------------------------------------------------------------------|
|              |                                                                |                                                                                                                               |                                                                                                                                                                                                        | improvement<br>and discharge 7<br>days later                                                                                                                                                                  |
| Tarhini 2021 | 71yr European<br>M                                             | Cardiac transplant,<br>also diabetes mellitus<br>& chronic kidney<br>disease; prednisone,<br>mycophenolic acid,<br>belatacept | 15 April 2020<br>hospitalized<br>for asthenia,<br>dry cough,<br>myalgia, and<br>low-grade<br>fever for 1<br>week. No<br>dyspnea or O2<br>need. +ve on<br>admission and<br>day 14 with<br><10% Covid-19 | At readmission,<br>treated in ICU<br>for cardiac<br>decompensatio<br>n due to<br>underlying<br>respiratory<br>infection.<br>[Unclear what<br>happened after<br>this; last test<br>day 121 &<br>culture +ve at |



| Study ID | Participants<br>(data extracted<br>for transplant<br>patients) | Transplant,<br>immunosuppressive<br>treatment &<br>comorbidities | Clinical course<br>of COVID-19<br>infection                                                                                                                                                | COVID-19<br>treatments                        |
|----------|----------------------------------------------------------------|------------------------------------------------------------------|--------------------------------------------------------------------------------------------------------------------------------------------------------------------------------------------|-----------------------------------------------|
|          |                                                                |                                                                  | <p>involvement on CT scan. Discharged day 39 after clinical improvement, despite persistent +ve PCR at day 32 (21 Ct). 23 June readmitted with dry cough, dyspnea, and O2 requirement.</p> | <p>day 103, negative serology throughout]</p> |

| Study ID     | Participants<br>(data extracted<br>for transplant<br>patients) | Transplant,<br>immunosuppressive<br>treatment &<br>comorbidities                                                                                                                                                                                                                        | Clinical course<br>of COVID-19<br>infection                                                                                                                                                            | COVID-19<br>treatments                                                                                                            |
|--------------|----------------------------------------------------------------|-----------------------------------------------------------------------------------------------------------------------------------------------------------------------------------------------------------------------------------------------------------------------------------------|--------------------------------------------------------------------------------------------------------------------------------------------------------------------------------------------------------|-----------------------------------------------------------------------------------------------------------------------------------|
| Weigang 2021 | 58 yr M                                                        | kidney transplant, also CHD, arterial hypertension, hyperlipidemia, obesity; basiliximab (20mg, day 0 and day 4 post-transplantation) and prednisone (250mg at day 0, 125 mg day 1, 50mg day 2 to 5, 20mg day 6 to 10, then 15 mg/day). Additionally tacrolimus (10mg day 0, 8mg day 1, | March 2020, mild respiratory symptoms & tested positive for SARS-CoV-2 for over 145 days; discharged on day 72 for home quarantine; re-hospitalized at day 106 to 126 due to another kidney transplant | Ivermectin 4 day course (33mg/day, day 56 to 60); 10 day course remdesivir (200 mg on day 140, then 100 mg/daily, day 141 to 149) |

| Study ID | Participants<br>(data extracted<br>for transplant<br>patients) | Transplant,<br>immunosuppressive<br>treatment &<br>comorbidities                                                                                                                                                               | Clinical course<br>of COVID-19<br>infection                                                                 | COVID-19<br>treatments |
|----------|----------------------------------------------------------------|--------------------------------------------------------------------------------------------------------------------------------------------------------------------------------------------------------------------------------|-------------------------------------------------------------------------------------------------------------|------------------------|
|          |                                                                | 5.5mg day 2, 5mg day 3 and 4, then 4mg/day) and Mycophenolate mofetil (2000mg/day). Maintenance immunosuppression consisted of tacrolimus (4 to 6mg/day), mycophenolate mofetil (2,000mg/day), and prednisone (10 to 20mg/day) | failure. Days 140 to 149 treated with remdesivir; subsequent PCR tests negative & virus isolation negative. |                        |

511 Abbreviations:

512 APS = anti-phospholipid syndrome

- 513 AZA = azathioprine
- 514 CAD = coronary artery disease
- 515 DM = diabetes mellitus
- 516 HTN = hypertension
- 517 MMF = mycophenolate mofetil
- 518 NP = nasopharyngeal
- 519 Pt = patient
- 520 RTI = respiratory tract infection
- 521 RT-PCR = reverse transcriptase polymerase chain reaction
- 522

523 **Table 2.** Quality of included studies.

| <b>Study ID</b>  | <b>Were the criteria for diagnosing a case clearly reported and appropriate ?</b> | <b>Was the reporting of patient/ population characteristic s adequate?</b> | <b>Was the study period, including follow-up, sufficient?</b> | <b>Were the methods used to obtain RT-PCR results replicable and appropriate?</b> | <b>Were the methods used to obtain viral culture results replicable and appropriate?</b> |
|------------------|-----------------------------------------------------------------------------------|----------------------------------------------------------------------------|---------------------------------------------------------------|-----------------------------------------------------------------------------------|------------------------------------------------------------------------------------------|
| Alshukairi 2021  | Unclear*                                                                          | No**                                                                       | Yes                                                           | Yes                                                                               | Unclear                                                                                  |
| Aydillo 2020     | Unclear                                                                           | Yes                                                                        | Yes                                                           | Unclear                                                                           | Yes                                                                                      |
| Benotmane I 2021 | Yes                                                                               | Yes                                                                        | Yes                                                           | Yes                                                                               | No***                                                                                    |
| Decker A 2020    | No                                                                                | Yes                                                                        | Yes                                                           | Unclear                                                                           | Unclear                                                                                  |
| Lang C 2020      | Yes                                                                               | Yes                                                                        | Yes                                                           | Unclear                                                                           | Unclear                                                                                  |
| Niess 2020       | Yes                                                                               | Yes                                                                        | Yes                                                           | Yes                                                                               | Unclear                                                                                  |
| Niyonkuru M 2021 | No*                                                                               | Yes                                                                        | Yes                                                           | Yes                                                                               | Yes                                                                                      |
| Rajakumar 2021   | Yes                                                                               | Yes                                                                        | Yes                                                           | Yes                                                                               | Yes                                                                                      |

|              |     |     |     |     |     |
|--------------|-----|-----|-----|-----|-----|
| Tarhini 2021 | Yes | Yes | Yes | Yes | Yes |
| Weigang 2021 | Yes | Yes | Yes | Yes | Yes |

524

525 \*case definition unclear, article reports positive RT-PCR, but Ct cut-off not reported.

526 \*\* data on clinical symptoms lacking

527 \*\*\*The cell line used was not one that is demonstrated to support SARS-CoV-2 growth.

528 Therefore the cell culture results are not reliable.

529

530 **Table 3.** PCR cycle counts/log copies and viral culture results of included studies.

| Study ID        | Symptoms, days reported                             | RT-PCR Cycle count/log copies results                                                                                                                                                                                                              | Viral culture results (days)                                                                                                                                                     |
|-----------------|-----------------------------------------------------|----------------------------------------------------------------------------------------------------------------------------------------------------------------------------------------------------------------------------------------------------|----------------------------------------------------------------------------------------------------------------------------------------------------------------------------------|
| Alshukairi 2021 | NR no viral culture at admission/ons et of symptoms | Pt1: D3: positive, Ct NA, D26: positive, 22.87<br>Pt2: D3: positive, 11.58; D17: positive, 23.12<br>Pt3: D6: positive, 8.82, D19: positive, 13.88<br>Pt4: D4: positive, 10.38; D12: positive, 27.57<br>Pt5: D1: positive, 2.8, D9: positive, 14.84 | Pt1: D26: negative<br>Pt2: D17: negative<br>Pt3: D19: negative<br>Pt4: D12: negative<br>Pt5: D9: negative                                                                        |
| Aydillo 2020 *  | All symptomatic; variable severity                  | Pt1: D3: 22.5, D27: 34<br>Pt2: D2: 18, D27: 32<br>Pt4: D5: 19, D28: 18.5, D50: 27.5<br>Pt6: D18: 21, D27: 21.5, D33: 30.5, D38: 20, D45: 19.5, D52:                                                                                                | Pt1 D3: positive, D27: negative<br>Pt2: D2: positive, D27, negative<br>Pt4: D5: positive, D28: positive, D50: negative<br>Pt6: D18: negative, D27: negative, D33: negative, D38: |

| Study ID          | Symptoms, days reported | RT-PCR Cycle count/log copies results                                                                                                                                             | Viral culture results (days)                                                                                                                                                                                                                                                              |
|-------------------|-------------------------|-----------------------------------------------------------------------------------------------------------------------------------------------------------------------------------|-------------------------------------------------------------------------------------------------------------------------------------------------------------------------------------------------------------------------------------------------------------------------------------------|
|                   |                         | <p>20, D62: 18.5</p> <p>Pt8: D1: 22, D17: 21, D22: 22, D37: 35</p> <p>Pt9: D4: 13, D8: 22, D46: 33.5, D56: 27, D82: 38</p> <p>Pt13: D2: 21.5, D50: 31.5</p> <p>Pt14: D8: 17.5</p> | <p>negative, D45: positive, D52: positive, D62: positive</p> <p>Pt8: D1: positive, D17: positive, D22: negative, D37: negative</p> <p>Pt9: D4: positive, D8: positive, D46: negative, D56: negative, D82: negative</p> <p>Pt13: D2: positive, D50: negative</p> <p>Pt14: D8: positive</p> |
| Benotmane<br>2021 |                         | <p>Patient 6: D23: Ct &gt; 30; D29: Ct &gt; 35</p>                                                                                                                                | <p>Pt1: D5, D14: negative;</p> <p>Pt2: D21, D29: negative;</p> <p>Pt3: D25, D39: negative</p> <p>Pt4: D2: positive, D9, D16, D35: negative</p> <p>Pt5: D1, D8: positive; D23, D30: negative</p>                                                                                           |



| Study ID    | Symptoms, days reported         | RT-PCR Cycle count/log copies results                                                                                  | Viral culture results (days)                                                                                                                                                                                                                                                                                                                                                                           |
|-------------|---------------------------------|------------------------------------------------------------------------------------------------------------------------|--------------------------------------------------------------------------------------------------------------------------------------------------------------------------------------------------------------------------------------------------------------------------------------------------------------------------------------------------------------------------------------------------------|
|             |                                 | Patient 7: D38: Ct > 35<br><br>Patient 8: D28: Ct > 30<br><br><br><br><br><br><br><br><br><br>Patient 11: D27: Ct > 30 | Pt6: D6, D9, D23, D29: positive<br><br>Pt7: D7, D38: positive<br><br>Pt8: D1: negative, D8, D28: positive<br><br>Pt9: D11: negative, D30: negative<br><br>Pt10: D2, D8: negative<br><br>Pt11: D11, D27: positive<br><br>Pt12: D17, D27: negative<br><br>Pt13: D2, D9: positive; D31: negative<br><br>Pt14: D3, D19: negative<br><br>Pt15: D4, D17: negative<br><br>Pt16: D20: positive, D30: negative. |
| Decker 2020 | Mild symptoms. Day 0: transient | PCR +ve on days 1, 5, 7, 11, 18, 21, 25, 28, 33, and still on day 35<br><br>PCR remained positive on day 35            | Viral culture +ve at day 18 and day 21 post-onset of symptoms.                                                                                                                                                                                                                                                                                                                                         |

| Study ID  | Symptoms, days reported                                                                                           | RT-PCR Cycle count/log copies results                                                                                                                                                                                                                                                                                                        | Viral culture results (days)                                                   |
|-----------|-------------------------------------------------------------------------------------------------------------------|----------------------------------------------------------------------------------------------------------------------------------------------------------------------------------------------------------------------------------------------------------------------------------------------------------------------------------------------|--------------------------------------------------------------------------------|
|           | <p>episode of fever &amp; sore throat ; day 7 temperature increase; no clinical symptoms after day 20.</p>        | <p>with copy numbers similar to the onset of infection. Concurrent with the second onset of fever there was an increased viral load after day 7 that slowly returned to the level of infection onset.</p>                                                                                                                                    |                                                                                |
| Lang 2020 | <p>Admitted with fever &amp; cough becoming severe and life threatening leading to bilateral lung transplant.</p> | <p>Day 0, Ct 27; Day 17, Ct 21; Day 23, Ct 23; Day 19, Ct 32; Day 31, Ct 32; Day 36, Ct 29; Day 48, Ct 39; Day 53, Ct 34; Day 59, Ct 33; Day 61, PCR negative; Day 62, Ct 36; Day 62, PCR negative; Day 64, PCR negative; Day 65, Ct 36; Day 66, Ct 39; Day 69, Ct 39; Day 70, PCR negative; Day 72, PCR negative; Day 74, PCR negative;</p> | <p>Samples cultured from day 48 and day 65; both negative by cell culture.</p> |

| Study ID       | Symptoms, days reported                                            | RT-PCR Cycle count/log copies results                                                                                                                                                                    | Viral culture results (days)                                                                                                                                                            |
|----------------|--------------------------------------------------------------------|----------------------------------------------------------------------------------------------------------------------------------------------------------------------------------------------------------|-----------------------------------------------------------------------------------------------------------------------------------------------------------------------------------------|
|                |                                                                    | Day 76, PCR negative; Day 95, PCR negative;                                                                                                                                                              |                                                                                                                                                                                         |
| Niess 2020     | Mild symptoms of malaise and a dry cough                           | day 0: positive but asymptomatic<br>day 8, 12, 19, 22 - positive PCR<br>day 31, 32 - negative PCR<br>day 49, 55, 60 - positive PCR<br>day 58, 63, 64 - negative PCR results                              | Positive pre-transplant PCRs were not confirmed by cell cultures<br><br>4 negative viral cell culture results from samples taken on days 49, 54, 60 and 69<br><br>(* )                  |
| Niyonkuru 2021 | Pt1: fatigue and tachypnea, then ventilation required.<br><br>Pt2: | Pt1: day 15 from 1st positive PCR/day 3 from symptoms onset: Cq 21.7; day 21 from 1st positive PCR/day 9 from symptoms onset: Cq 19.21; day 43 from 1st positive PCR/day 13 from symptoms onset Cq 35.45 | Pt1: day 15 from 1st positive PCR/day 3 from symptoms onset viral culture at 61,277 PFU/swab; day 21 from 1st positive PCR/day 9 from symptoms onset viral culture at 256,410 PFU/swab; |

| Study ID       | Symptoms, days reported    | RT-PCR Cycle count/log copies results                                                                                                                                         | Viral culture results (days)                                                                                                                                                                                                                                                       |
|----------------|----------------------------|-------------------------------------------------------------------------------------------------------------------------------------------------------------------------------|------------------------------------------------------------------------------------------------------------------------------------------------------------------------------------------------------------------------------------------------------------------------------------|
|                | asymptomatic for COVID-19. | Pt2: day 9 from 1st positive PCR: Cq: 22.33; day 12 from 1st positive PCR Cq 22.57; day 14 from 1st positive PCR: Ct approx 33.5; day 18 from 1st positive PCR: PCR negative. | day 22 from 1st positive PCR/day 13 from symptoms onset viral culture negative.<br><br>Pt2: day 9 from 1st positive PCR: culture positive with 11082 PFU/swab; day 12 from 1st positive PCR: culture positive with PFU 55944/swab; day 14 from 1st positive PCR: culture negative. |
| Rajakumar 2021 |                            | Pt 1: hospital admission, positive PCR day 4 post-symptom onset<br>Day 4: N gene Ct 16, E gene Ct 19<br>Day 12: N gene Ct 13, E gene Ct 20                                    | Pt1<br>Viral culture<br>Day 4: positive<br>Day 12: positive<br>Day 20: positive<br>Day 27: positive                                                                                                                                                                                |

| Study ID | Symptoms, days reported | RT-PCR Cycle count/log copies results                                                                                                                                                                                                                                                                                                                    | Viral culture results (days)                                                                                                                                    |
|----------|-------------------------|----------------------------------------------------------------------------------------------------------------------------------------------------------------------------------------------------------------------------------------------------------------------------------------------------------------------------------------------------------|-----------------------------------------------------------------------------------------------------------------------------------------------------------------|
|          |                         | Day 20: N gene Ct 14, E gene Ct 19<br>Day 27: N gene Ct 15, E gene Ct 21<br>Day 32: N gene Ct 32, E gene Ct 28<br>Day 60: N gene Ct 30, E gene Ct 35<br>Pt 2:<br>Day 16: N gene Ct 14, E gene Ct 20<br>Day 22: N gene Ct 25, E gene Ct 33<br>Day 25: N gene Ct 25, E gene 29<br>Day 42: N gene Ct 29, E gene Ct 37<br>Day 51: N gene Ct 37, E gene Ct 39 | Day 32: negative<br>Day 60: negative<br>Pt 2: Viral culture<br>Day 16: positive<br>Day 22: negative<br>Day 25: negative<br>Day 42: negative<br>Day 51: negative |

| Study ID     | Symptoms, days reported                     | RT-PCR Cycle count/log copies results                                                                                                                                                                                           | Viral culture results (days)                                                                                                                                                                                  |
|--------------|---------------------------------------------|---------------------------------------------------------------------------------------------------------------------------------------------------------------------------------------------------------------------------------|---------------------------------------------------------------------------------------------------------------------------------------------------------------------------------------------------------------|
| Tarhini 2021 | Severe infection requiring intensive care   | Day 6: Ct=25,<br>Day 16: Ct=24<br>Day 32: Ct=20<br>Day 78: Ct=34<br>Day 80: Ct=24<br>Day 91: Ct=28<br>Day 103: Ct=23<br>Day 109: Ct=18<br>Day 120: Ct=26<br>Day 132: Ct=40+ (negative)<br>Day 136: Ct=40+ (negative)<br><br>(*) | Day 6: culture negative<br>Day 16: culture negative<br>Day 80: culture negative<br>Day 91: culture negative<br>Day 103: culture positive<br>Day 111: culture negative<br>Day 120: culture negative<br><br>(*) |
| Weigang 2021 | Mild respiratory symptoms for over 145 days | 38 PCR tests: days 0, 6, 10, 14, 16, 21, 24, 27, 31, 34, 38, 42, 45, 46, 49, 52, 56, 58, 63, 65, 71, 105, 113, 115, 119, 122, 126, 140, 143, 145, 146, 149, 150,                                                                | 27 cell culture tests, days: 0, 6, 10, 14, 16, 21, 24, 27, 31, 34, 38, 42, 45, 49, 52, 56, 58, 63, 65, 71, 105, 106, 113, 115, 119, 140, 154; 27 results: -, +, +, +, -,                                      |

| Study ID | Symptoms, days reported | RT-PCR Cycle count/log copies results                                                                                                                                                                 | Viral culture results (days)                                                                                             |
|----------|-------------------------|-------------------------------------------------------------------------------------------------------------------------------------------------------------------------------------------------------|--------------------------------------------------------------------------------------------------------------------------|
|          |                         | 154, 161, 167, 174, 189. 38<br><br>Ct values: 25, 16, 19, 19, 25, 23, 18, 26, 20, 17, 31, 27, 27, 50, 27, 28, 25, 28, 27, 29, 30, 23, 34, 29, 31, 31, 36, 26, 29, 34, 39, 45, 45, 34, 45, 45, 45, 45. | +, +, ++, +, -, -, -, -, -, -, -, -, +,<br><br>-, -, -, -, -, (i.e. positive on days 6, 10, 14, 21, 24, 27, 31, 34, 105) |

531

532

533 (\*) Numbers have been read from a figure in the published article and may not be an accurate  
 534 estimate.

535

536 Ct = cycle threshold

537 D = day

538 NR = not reported

539 NA = not available

540 Pt = patient

541 RT-PCR = reverse transcriptase polymerase chain reaction

**Figure 1.** PRISMA flow chart of study screening for inclusion.

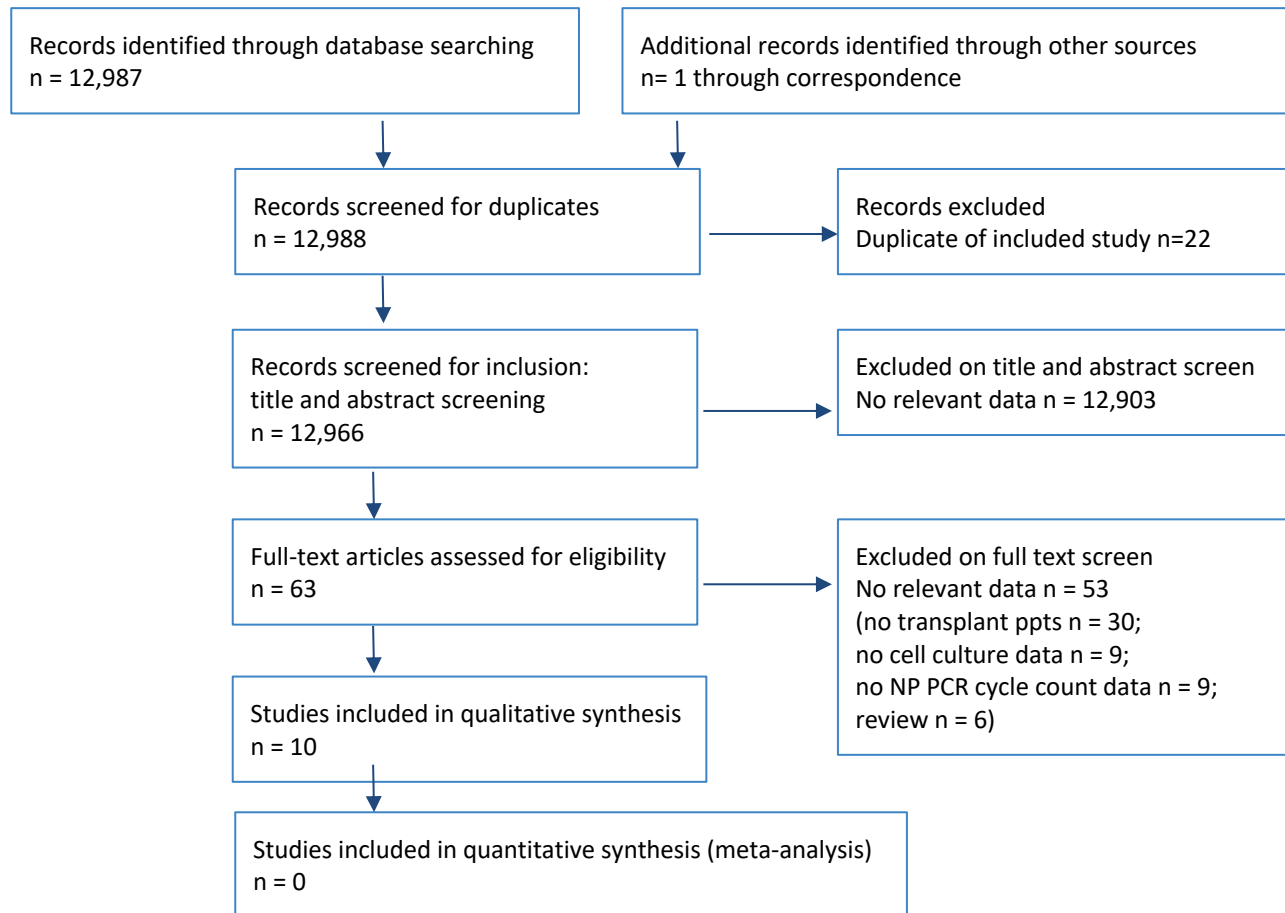



**Figure 2.** SARS-CoV-2 culture results in transplant patients from days of symptom onset.

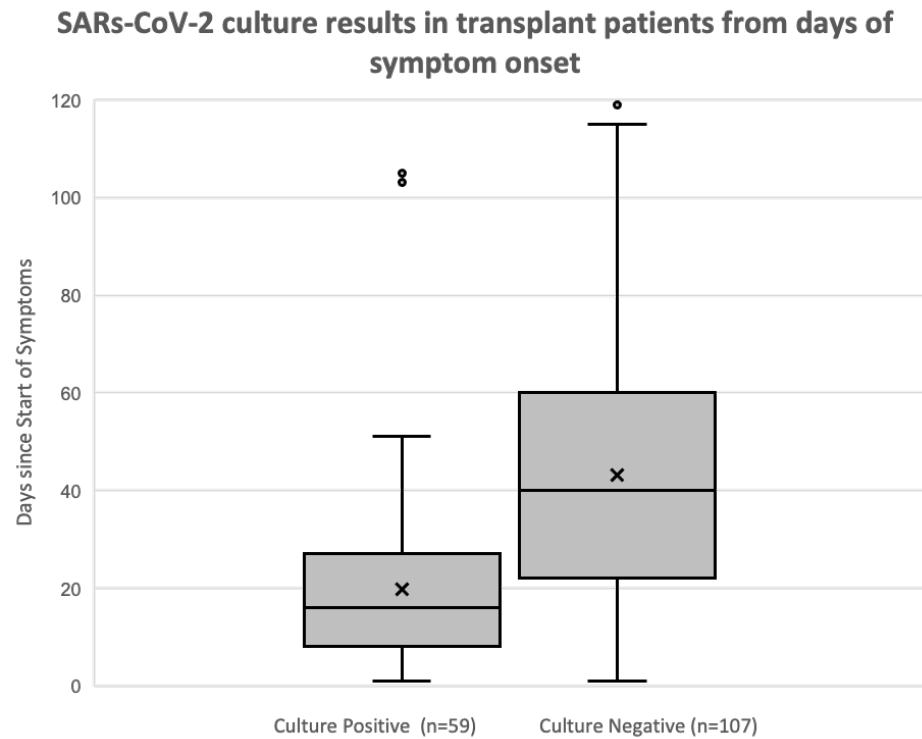

Culture positive (n=59 samples): median 16 (IQR 8-27, Range 1-105 days, mean 19.7 days  
Culture negative (n=107 samples): median 40 (IQR 22-60), Range 1-119 days, mean 43.2 days

**Figure 3a.** Timings of positive culture results in Transplant Patients by duration of symptoms and Ct results  
 Alshukairi [7], Benotmane [8], Rajakumar [15] & Niyonkuru [14] (days 1- 42)

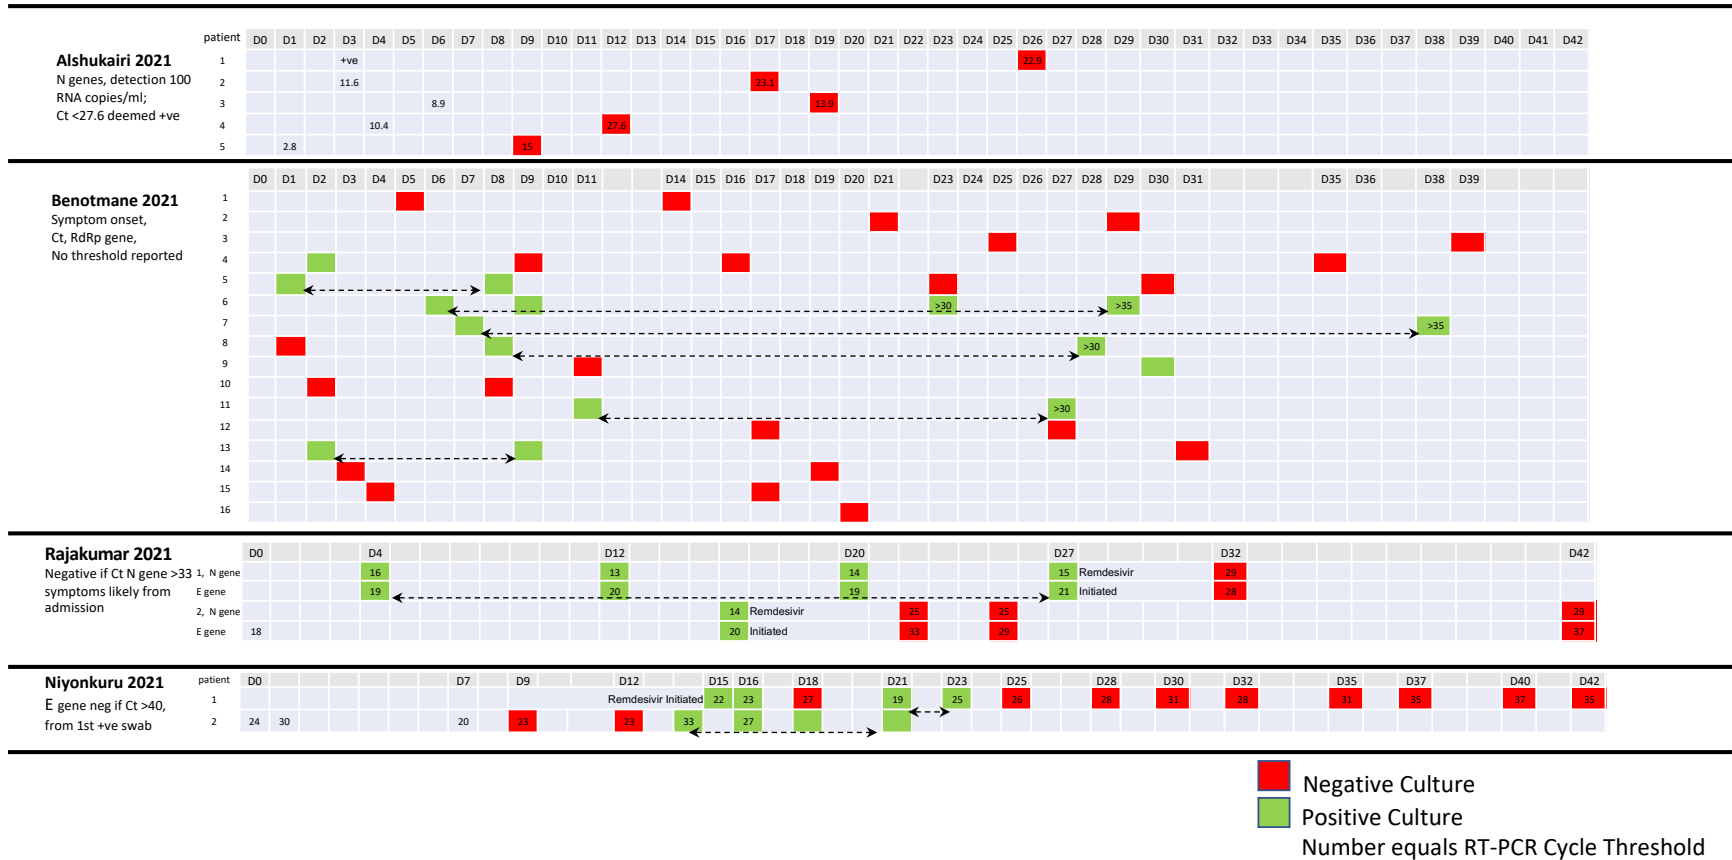

**Figure 3b.** Timings of positive culture results in Transplant Patients by duration of symptoms and Ct results  
 Aydillo [6] (day 1-90), Tarhini [9] & Weigang [12] (day 1-120)

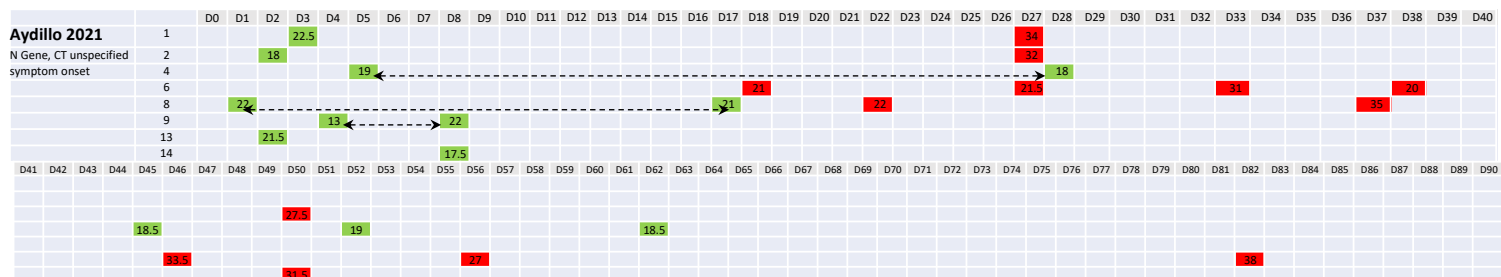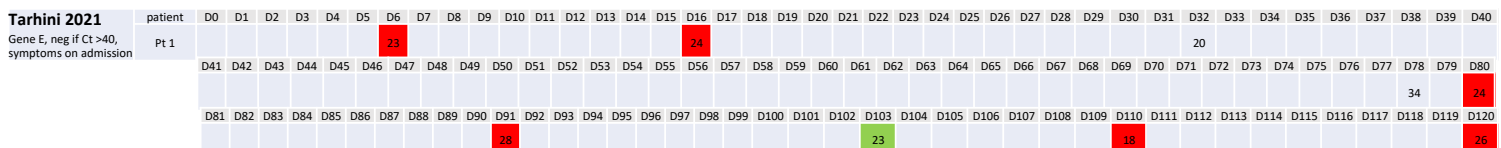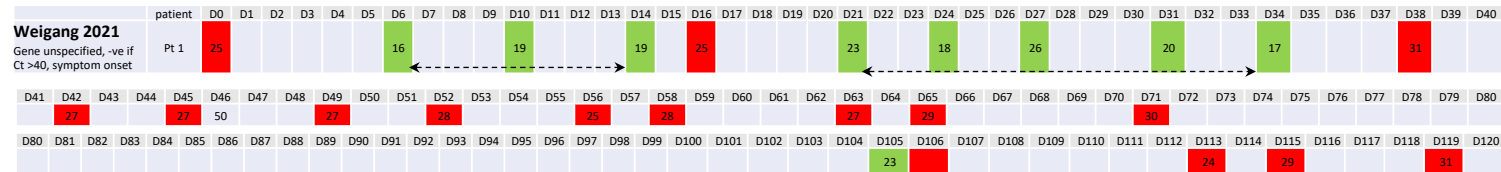

■ Negative Culture  
■ Positive Culture  
 Number equals RT-PCR Cycle Threshold

**Figure 3c.** Timings of positive culture results in Transplant Patients by duration of symptoms and log10 copies/ml results  
 Decker <sup>[10]</sup> (days 1-36)

|                                                                | patient | D0 | D1  | D2 | D3 | D4 | D5 | D6 | D7 | D8 | D9 | D10 | D11 | D12 | D13 | D14 | D15 | D16 | D17 | D18 | D19 | D20 | D21 | D22 | D23 | D24 | D25 | D26 | D27 | D28 | D29 | D30 | D31 | D32 | D33 | D34 | D35 | D36 |
|----------------------------------------------------------------|---------|----|-----|----|----|----|----|----|----|----|----|-----|-----|-----|-----|-----|-----|-----|-----|-----|-----|-----|-----|-----|-----|-----|-----|-----|-----|-----|-----|-----|-----|-----|-----|-----|-----|-----|
| <b>Decker 2020</b><br>log10 copies/ml,<br>> 4 log10 deemed +ve | 1       |    | 4.5 |    |    |    | 4  |    | 6  |    |    |     | 6.2 |     |     |     |     |     |     | 6.2 |     |     | 6.5 |     |     |     | 5   |     | 4.5 |     |     |     |     |     | 4   |     | 4   |     |

- Negative Culture
- Positive Culture
- Number equals log copies/ml

Figure 4. Relationship between cycle threshold, symptom onset (in days) and likelihood of shedding replication competent virus

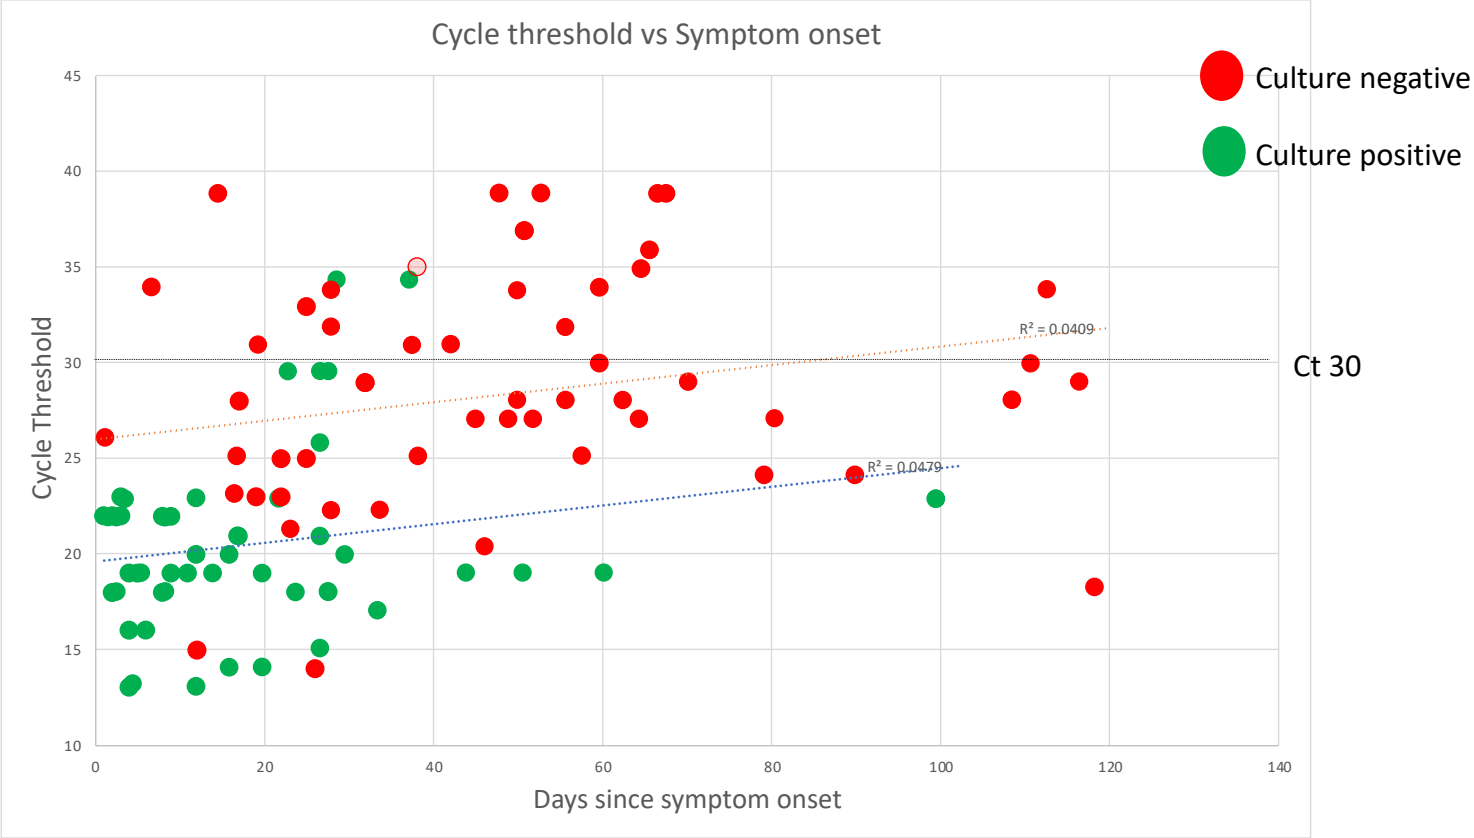

Source: https://medrxiv.org/content/10.1101/2022.03.01.22271684v2.full.pdf
